# Supplementary material
Source: publisher site journal article supplement (https://www.dovepress.com/article/263701)
Supplement: Supplementary file 1 [file get_supplementary_file.php]

Supplementary Data:

High resolution mass spectra:


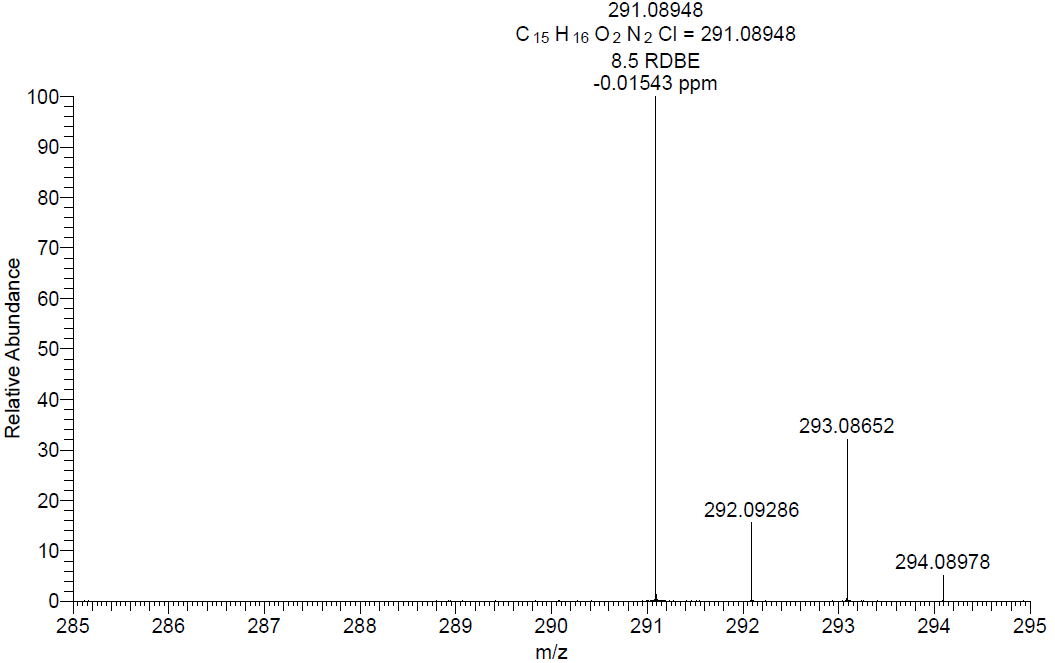


1H NMR:


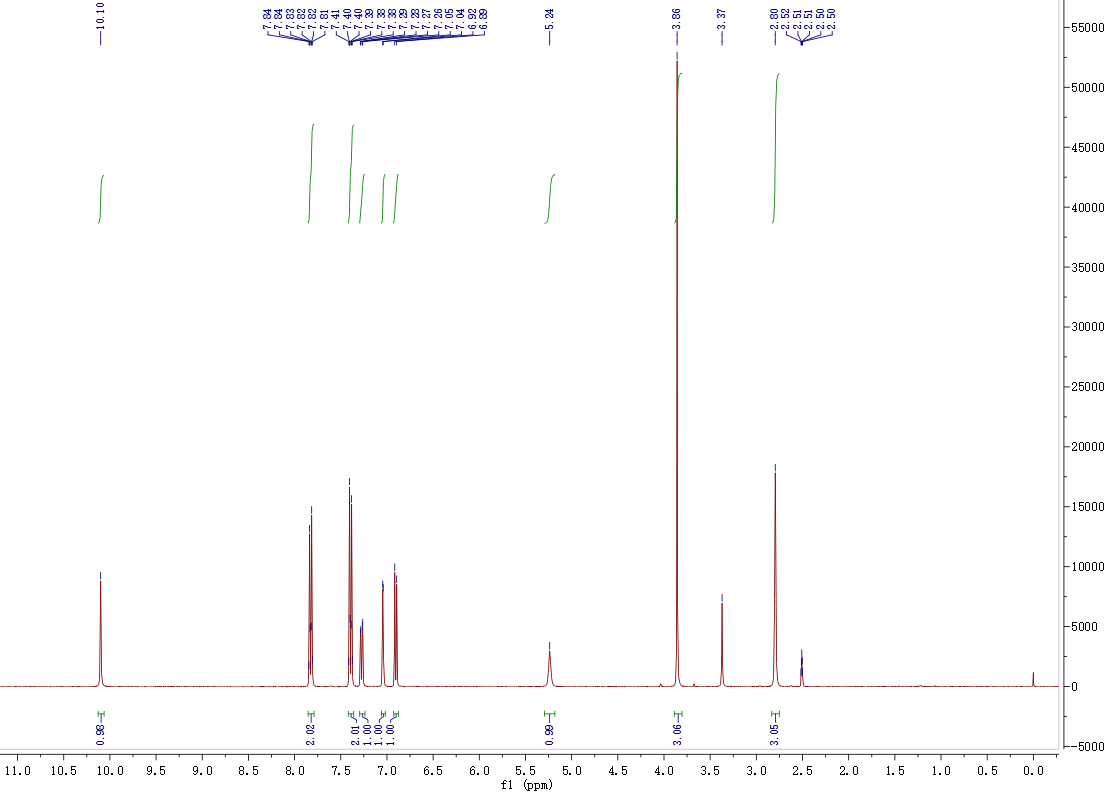


13C NMR:


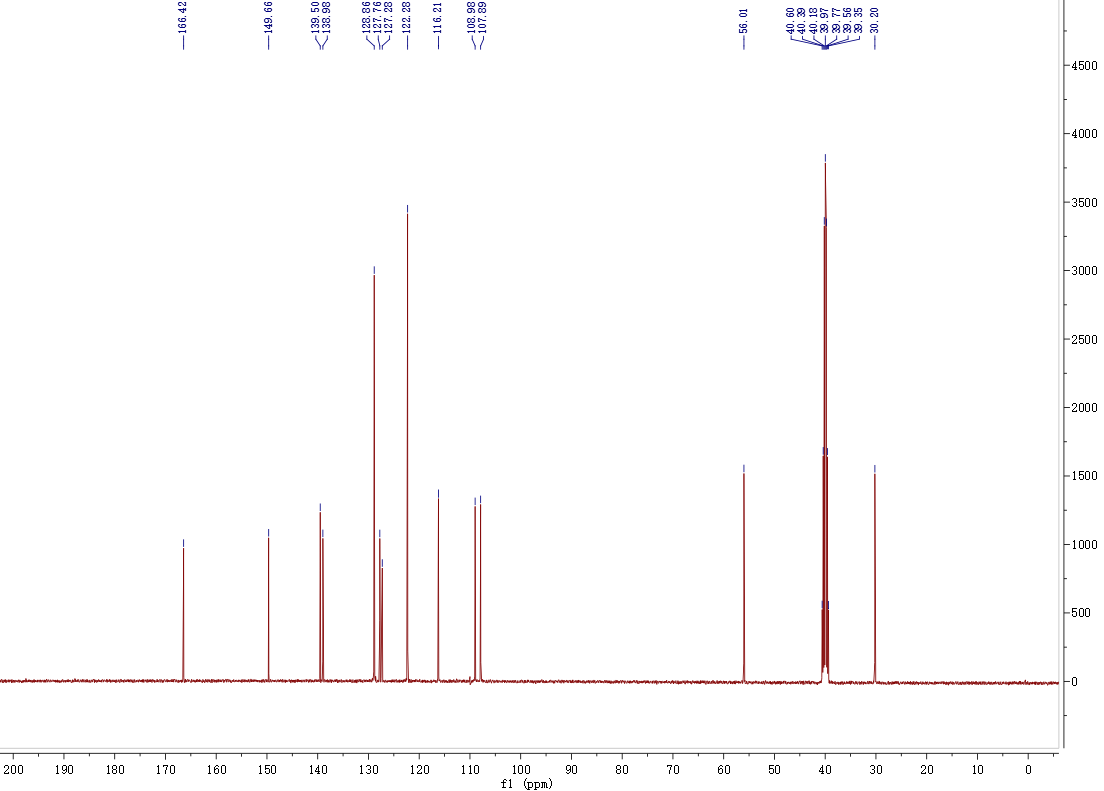


HPLC:


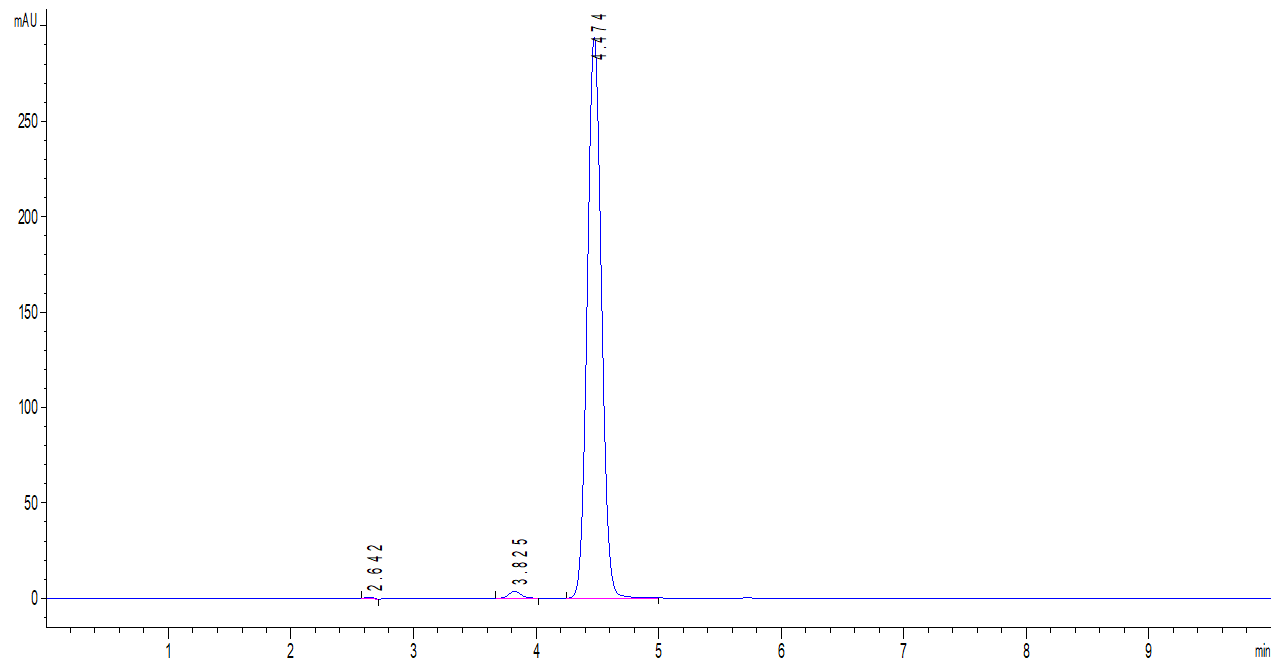


**Table S1.** Mean (±SD) plasma concentration of IMB-0523 in SD rats (n = 3).

| Time (h) | Plasma concentration (ng/mL) |
| --- | --- |
| 0.083 | 1088.94±359.93 |
| 0.25 | 1941.08±304.96 |
| 0.5 | 1989.39±184.03 |
| 1 | 2582.55±704.91 |
| 2 | 1984.45±871.36 |
| 3 | 1346.94±632.10 |
| 4 | 567.25±331.07 |
| 6 | 65.37±41.36 |
| 8 | 7.44±5.21 |
| 12 | ND |
| 24 | ND |

ND: Not detected.
